# Supplementary material
Source: PubMed Central journal article supplement (PMC8435074)

Figure S1 - Characterization of GCaMP5 from AAV in rat primary cortical neurons

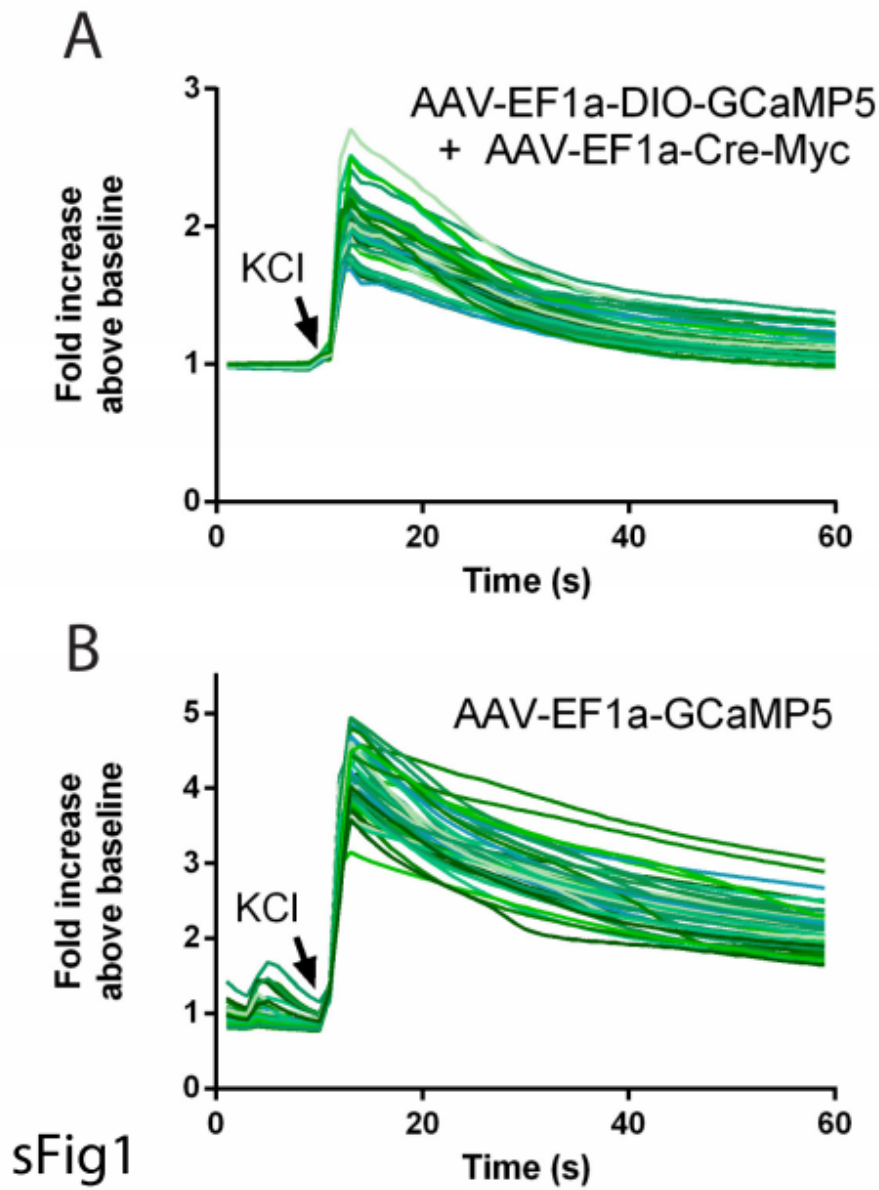

Figure S2 - Meth activated intracellular Ca<sup>++</sup> fluorescence in PFA-fixed and non-fixed cells

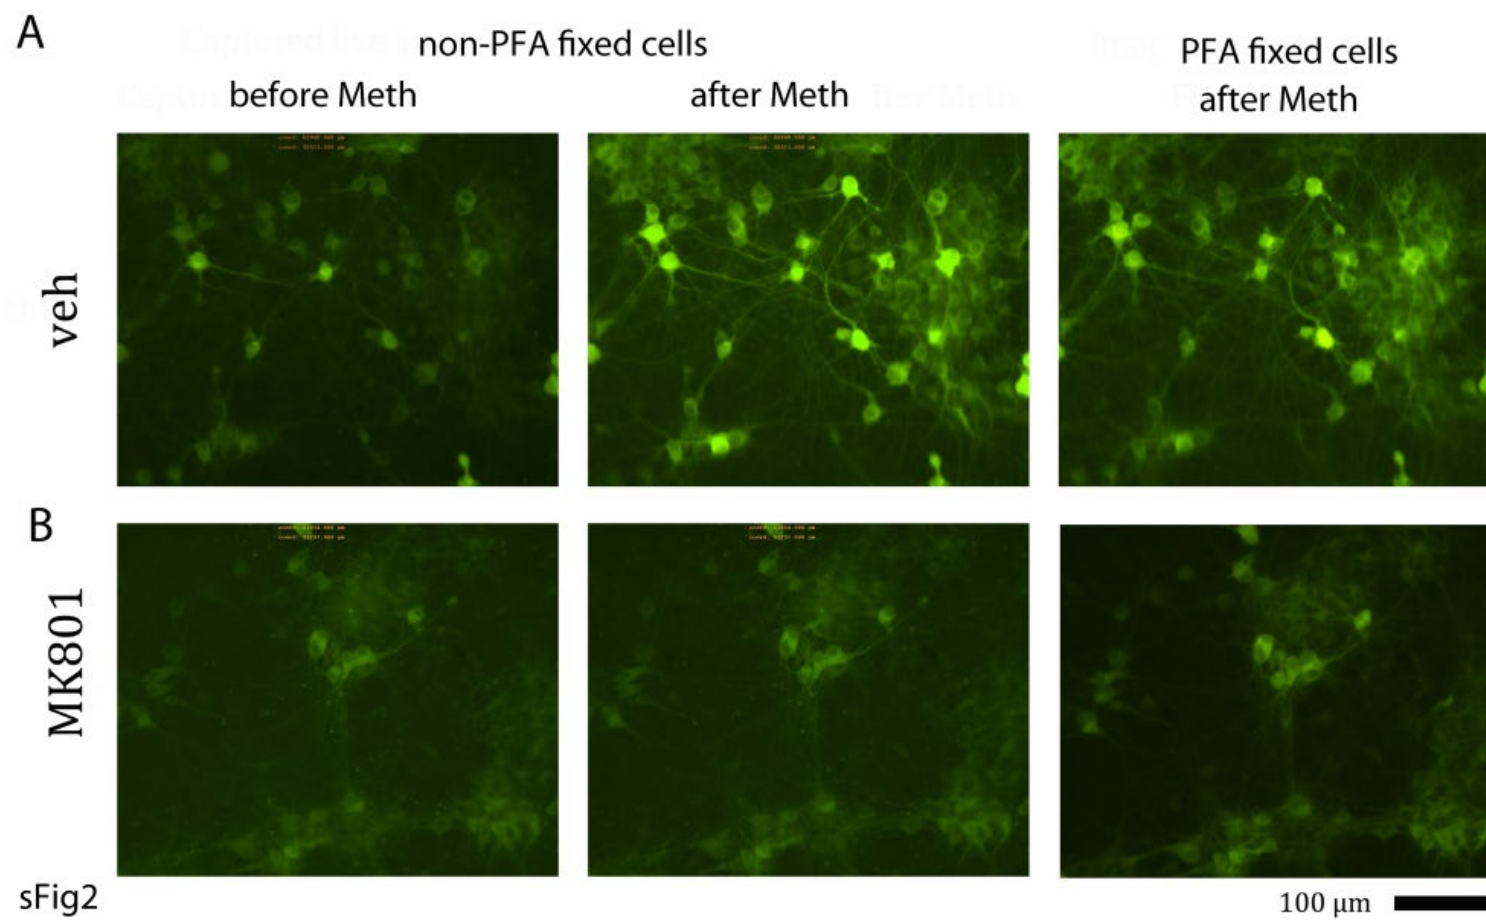

Supplement: NIHMS1725428-supplement-3.pdf [file NIHMS1725428-supplement-3.pdf]
